# Supplementary material
Source: PubMed Central journal article supplement (PMC4365665)
Supplement: ar500447q_si_001.pdf [file ar500447q_si_001.pdf]

# Taking Up the Cyanine Challenge with Quantum Tools: Supporting Information

Boris Le Guennic<sup>\*,†</sup> and Denis Jacquemin<sup>\*,‡,¶</sup>

*Institut des Sciences Chimiques de Rennes, UMR 6226 CNRS-Université de Rennes 1, 263  
Av. du Général Leclerc, 35042 Rennes Cedex, France, Laboratoire CEISAM - UMR CNRS  
6230, Université de Nantes, 2 Rue de la Houssinière, BP 92208, 44322 Nantes Cedex 3,  
France, and Institut Universitaire de France, 103, bd Saint-Michel, F-75005 Paris Cedex  
05, France.*

E-mail: Boris.leguennic@univ-rennes1.fr; Denis.Jacquemin@univ-nantes.fr

## S1 Expanded Tables

---

\*To whom correspondence should be addressed

†ISCR, Rennes

‡CEISAM, Nantes

¶IUF, Paris

Table S-1: Vertical transition energies to the lowest excited-state calculated with various wavefunction models for model cyanines. All values are in eV. For methods implying the selection of an active space, the values obtained with the optimal active space as selected in the original works are reported.

| Method                                   | Geometry         | Basis set          | CN3  | CN5  | CN7  | CN9  | CN11 | Ref. |
|------------------------------------------|------------------|--------------------|------|------|------|------|------|------|
| Multi-reference wavefunction approaches  |                  |                    |      |      |      |      |      |      |
| DMC                                      | MP2/cc-pVQZ      | T'+ <sup>a</sup>   | 7.38 | 5.03 | 3.83 | 3.09 | 2.62 | 1    |
| CAS-SCF                                  | B3LYP/6-31G(d,p) | ANO(4s3p2d/3s1p)   | 7.73 | 4.85 | 3.55 | 2.70 | 2.16 | 2    |
| CAS-SCF                                  | MP2/cc-pVQZ      | ANO-L-VTZP         | 7.56 | 5.32 | 3.91 | 3.13 | 2.39 | 1    |
| CAS-PT2                                  | B3LYP/6-31G(d,p) | ANO(4s3p2d/3s1p)   | 6.50 | 4.28 | 3.18 | 2.52 | 2.11 | 2    |
| CAS-PT2                                  | MP2/cc-pVQZ      | ANO-L-VTZP         | 6.99 | 4.46 | 3.30 | 2.59 | 2.10 | 1    |
| CAS-PT2 (IPEA shift)                     | MP2/cc-pVQZ      | ANO-L-VTZP         | 7.19 | 4.69 | 3.52 | 2.81 | 2.46 | 1    |
| Single-reference wavefunction approaches |                  |                    |      |      |      |      |      |      |
| ADC(2)                                   | MP2/cc-pVQZ      | <i>aug-cc-pVTZ</i> |      | 4.64 | 3.46 | 2.78 | 2.32 | 3    |
| CIS                                      | B3LYP/6-31G(d,p) | 6-31G(d)           | 8.91 | 6.07 | 4.74 | 3.94 | 3.41 | 2    |
| CIS                                      | MP2/cc-pVQZ      | TZVP               |      | 6.08 | 4.77 | 3.98 | 3.45 | 4    |
| CIS(D)                                   | MP2/cc-pVQZ      | TZVP               |      | 4.85 | 3.65 | 2.95 | 2.48 | 4    |
| CC2                                      | MP2/cc-pVQZ      | ANO-L-VTZP         | 7.26 | 4.97 | 3.79 | 3.10 | 2.64 | 1    |
| CCSD                                     | MP2/cc-pVQZ      | ANO-L-VTZP         | 7.29 | 4.98 | 3.81 | 3.11 |      | 1    |
| CC3                                      | MP2/cc-pVQZ      | Extrapolated       | 7.16 | 4.84 | 3.65 | 2.96 | 2.53 | 1    |
| GW/BSE                                   | PBE0/cc-pVQZ     | <i>aug-cc-pVTZ</i> |      | 4.80 | 3.63 | 2.96 | 2.48 | 5    |
| HF (RPA)                                 | MP2/cc-pVQZ      | TZVP               |      | 5.79 | 4.51 | 3.75 | 3.23 | 4    |
| Semi-empirical approaches                |                  |                    |      |      |      |      |      |      |
| PPP                                      | –                | –                  | 5.87 | 3.91 | 3.04 | 2.50 | 2.12 | 6,7  |
| ZINDO/S                                  | B3LYP/6-31+G(d)  | –                  | 6.36 | 4.29 | 3.42 | 2.87 | 2.48 | 7    |

<sup>a</sup>cc-pVTZ for C and N, cc-pVDZ for H augmented by *s*, *p* and *d* diffuse functions.

Table S-2: Vertical transition energies to the lowest excited-state calculated with various DFT-based models for model cyanines. All values are in eV and are obtained at the TD-DFT level except when noted (TDA: Tamm-Dancoff Approximation).

| Method                              | Geometry                | Basis set          | CN3  | CN5  | CN7  | CN9  | CN11 | Ref. |
|-------------------------------------|-------------------------|--------------------|------|------|------|------|------|------|
| Pure functionals                    |                         |                    |      |      |      |      |      |      |
| BLYP                                | BLYP/6-311++G(d,p)      | 6-311G(d,p)        | 7.25 | 5.10 | 4.00 | 3.35 | 2.91 | 8    |
| BLYP                                | MP2/cc-pVQZ             | TZVP               |      | 5.29 | 4.15 | 3.47 | 3.01 | 4    |
| M06-L                               | PBE0/cc-pVQZ            | <i>aug-cc-pVTZ</i> |      | 5.40 | 4.25 | 3.56 | 3.11 | 9    |
| PBE                                 | PBE/6-311++G(d,p)       | 6-311G(d,p)        | 7.56 | 5.25 | 4.12 | 3.44 | 2.99 | 8    |
| PBE                                 | PBE0/cc-pVQZ            | ANO-L-VTZP         | 7.40 | 5.22 | 4.11 | 3.44 | 2.98 | 1    |
| PBE                                 | PBE0/cc-pVQZ            | <i>aug-cc-pVTZ</i> |      | 5.23 | 4.12 | 3.45 | 3.00 | 9    |
| PBE                                 | MP2/cc-pVQZ             | TZVP               |      | 5.30 | 4.15 | 3.47 | 3.01 | 4    |
| PBE (TDA)                           | MP2/cc-pVQZ             | TZVP               |      | 6.00 | 4.92 | 4.27 | 3.56 | 4    |
| Global hybrid functionals           |                         |                    |      |      |      |      |      |      |
| B3LYP                               | B3LYP/6-31+G(d)         | 6-31+G(d)          | 7.60 | 5.28 | 4.12 | 3.44 | 2.99 | 7    |
| B3LYP                               | B3LYP/6-31G(d,p)        | 6-31G(d)           | 7.88 | 5.38 | 4.19 | 3.51 | 3.04 | 2    |
| B3LYP                               | B3LYP/6-31G(d,p)        | TZ2P               | 7.57 | 5.24 | 4.11 | 3.43 | 2.98 | 2    |
| PBE0                                | PBE0/6-311++G(d,p)      | 6-311G(d,p)        | 7.70 | 5.34 | 4.17 | 3.49 | 3.02 | 8    |
| PBE0                                | PBE0/cc-pVQZ            | ANO-L-VTZP         | 7.62 | 5.33 | 4.18 | 3.50 | 3.03 | 1    |
| PBE0                                | PBE0/cc-pVQZ            | <i>aug-cc-pVTZ</i> |      | 5.34 | 4.19 | 3.50 | 3.05 | 9    |
| PBE0 (TDA)                          | PBE0/cc-pVQZ            | ANO-L-VTZP         | 8.03 | 5.84 | 4.71 | 4.02 | 3.54 | 1    |
| M05                                 | PBE0/cc-pVQZ            | <i>aug-cc-pVTZ</i> |      | 5.30 | 4.15 | 3.47 | 3.00 | 9    |
| M06                                 | PBE0/cc-pVQZ            | <i>aug-cc-pVTZ</i> |      | 5.23 | 4.10 | 3.43 | 2.98 | 9    |
| M06                                 | MP2/cc-pVQZ             | TZVP               |      | 5.31 | 4.17 | 3.46 | 3.00 | 4    |
| BHHLYP (TDA)                        | MP2/cc-pVQZ             | <i>aug-cc-pVTZ</i> |      | 5.74 | 4.57 | 3.85 | 3.35 | 3    |
| BHHLYP                              | MP2/cc-pVQZ             | <i>aug-cc-pVTZ</i> |      | 5.35 | 4.19 | 3.49 | 3.02 | 3    |
| M08-HX                              | PBE0/cc-pVQZ            | <i>aug-cc-pVTZ</i> |      | 5.23 | 4.09 | 3.41 | 2.95 | 9    |
| M05-2X                              | PBE0/cc-pVQZ            | <i>aug-cc-pVTZ</i> |      | 5.33 | 4.17 | 3.47 | 3.00 | 9    |
| M06-2X                              | PBE0/cc-pVQZ            | <i>aug-cc-pVTZ</i> |      | 5.23 | 4.09 | 3.41 | 2.95 | 9    |
| M06-2X                              | MP2/cc-pVQZ             | TZVP               |      | 5.27 | 4.11 | 3.42 | 2.95 | 4    |
| M08-SO                              | PBE0/cc-pVQZ            | <i>aug-cc-pVTZ</i> |      | 5.16 | 4.04 | 3.37 | 2.91 | 9    |
| M06-HF                              | PBE0/cc-pVQZ            | <i>aug-cc-pVTZ</i> |      | 5.13 | 3.98 | 3.30 | 2.83 | 9    |
| M06-HF                              | MP2/cc-pVQZ             | TZVP               |      | 5.15 | 3.99 | 3.29 | 2.82 | 4    |
| Range-separated hybrid functionals  |                         |                    |      |      |      |      |      |      |
| LC-BLYP                             | LC-BLYP/6-311++G(d,p)   | 6-311G(d,p)        | 7.47 | 5.19 | 4.05 | 3.37 | 2.90 | 8    |
| CAM-B3LYP                           | CAM-B3LYP/6-311++G(d,p) | 6-311G(d,p)        | 7.61 | 5.28 | 4.13 | 3.44 | 2.98 | 8    |
| CAM-B3LYP                           | PBE0/cc-pVQZ            | ANO-L-VTZP         | 7.55 | 5.26 | 4.12 | 3.44 | 2.97 | 1    |
| LC-PBE                              | LC-PBE/6-311++G(d,p)    | 6-311G(d,p)        | 7.61 | 5.25 | 4.09 | 3.40 | 2.93 | 8    |
| LC-PBE                              | HF/cc-pVQZ              | TZVP               |      | 5.31 | 4.13 | 3.43 | 2.96 | 4    |
| LC-PBE                              | BP86/cc-pVQZ            | TZVP               |      | 5.16 | 4.01 | 3.32 | 2.85 | 4    |
| LC-PBE                              | PBE/cc-pVQZ             | TZVP               |      | 5.16 | 4.01 | 3.32 | 2.86 | 4    |
| LC-PBE                              | PBE0/cc-pVQZ            | TZVP               |      | 5.26 | 4.09 | 3.39 | 2.92 | 4    |
| LC-PBE                              | LC-PBE* /cc-pVQZ        | TZVP               |      | 5.30 | 4.12 | 3.42 | 2.94 | 4    |
| LC-PBE                              | LC-PBE0* /cc-pVQZ       | TZVP               |      | 5.33 | 4.15 | 3.44 | 2.96 | 4    |
| LC-PBE                              | MP2/cc-pVQZ             | TZVP               |      | 5.26 | 4.09 | 3.39 | 2.92 | 4    |
| LC-PBE*                             | MP2/cc-pVQZ             | TZVP               |      | 5.26 | 4.09 | 3.40 | 2.94 | 4    |
| LC-PBE0*                            | MP2/cc-pVQZ             | TZVP               |      | 5.37 | 4.19 | 3.49 | 3.02 | 4    |
| Double-hybrid functionals           |                         |                    |      |      |      |      |      |      |
| B2PLYP                              | B3LYP/TZVP              | TZV2P              | 7.47 | 5.12 | 3.87 | 3.23 | 2.80 | 10   |
| B2PLYP                              | PBE0/cc-pVQZ            | ANO-L-VTZP         | 7.30 | 5.05 | 3.92 | 3.25 | 2.80 | 1    |
| Alternative schemes                 |                         |                    |      |      |      |      |      |      |
| $\Delta$ SCF-BHHLYP                 | PBE0/TZ                 | TZ (STO)           | 7.33 | 4.81 | 3.55 | 2.79 | 2.29 | 11   |
| $\Delta$ SCF-BHHLYP <sup>a</sup>    | MP2/cc-pVQZ             | <i>aug-cc-pVTZ</i> |      | 4.87 | 3.72 | 3.06 | 2.62 | 3    |
| $\Delta$ SCF-CAM-B3LYP <sup>a</sup> | MP2/cc-pVQZ             | <i>aug-cc-pVTZ</i> |      | 4.71 | 3.65 | 3.03 | 2.62 | 3    |
| SF-BHHLYP <sup>b</sup>              | MP2/cc-pVQZ             | <i>aug-cc-pVTZ</i> |      | 5.09 | 3.95 | 3.27 | 2.82 | 3    |

<sup>a</sup>SSR variations of the  $\Delta$ SCF model; <sup>b</sup>Spin-flip approach.

Table S-3: Vertical transition energies to the lowest excited-state calculated with various schemes (in eV) for the methylated structures (NMe<sub>2</sub> end groups instead of NH<sub>2</sub> end groups). See the caption of Tables S-1 and S-2 for more details.

| Method                                   | Geometry         | Basis set      | Me-CN3 | Me-CN5 | Me-CN7 | Me-CN9 | Me-CN11 | Ref. |
|------------------------------------------|------------------|----------------|--------|--------|--------|--------|---------|------|
| Multi-reference wavefunction approaches  |                  |                |        |        |        |        |         |      |
| CAS-SCF                                  | B3LYP/6-31G(d,p) | ANO(4s3p1d/2s) |        | 5.97   | 4.04   | 2.63   | 2.07    | 2    |
| CAS-PT2                                  | B3LYP/6-31G(d,p) | ANO(4s3p1d/2s) |        | 4.17   | 2.95   | 2.32   | 1.93    | 2    |
| Single-reference wavefunction approaches |                  |                |        |        |        |        |         |      |
| CC2                                      | MP2/cc-pVQZ      | ANO-L-VTZP     | 6.07   | 4.58   | 3.53   | 2.90   | 2.47    | 1    |
| SAC-CI                                   | B3LYP/6-31+G(d)  | 6-31G(d)       | 5.90   | 4.25   | 3.02   | 2.17   |         | 12   |
| SORCI                                    | B3LYP/6-31+G(d)  | 6-31G          | 6.08   | 4.40   | 3.34   | 2.70   | 2.27    | 12   |
| TD-DFT approaches                        |                  |                |        |        |        |        |         |      |
| BLYP                                     | B3LYP/6-31+G(d)  | 6-311+G(d,p)   | 5.71   | 4.51   | 3.65   | 3.11   | 2.84    | 12   |
| BLYP <sup>a</sup>                        | PBE0/6-311G(d,p) | 6-311+G(2d,p)  | 5.63   | 4.40   | 3.49   | 2.92   |         | 13   |
| B3LYP                                    | B3LYP/6-31+G(d)  | 6-31+G(d)      | 6.08   | 4.70   | 3.76   | 3.28   | 2.80    | 12   |
| B3LYP                                    | B3LYP/6-31+G(d)  | 6-311+G(d,p)   | 6.02   | 4.66   | 3.73   | 3.17   | 2.79    | 12   |
| B3LYP                                    | B3LYP/6-31+G(d)  | 6-311+G(3df,p) | 5.99   | 4.64   | 3.72   | 3.15   | 2.78    | 12   |
| B3LYP <sup>a</sup>                       | PBE0/6-311G(d,p) | 6-311+G(2d,p)  | 5.94   | 4.56   | 3.57   | 2.97   |         | 13   |
| B3LYP (TDA)                              | B3LYP/6-31+G(d)  | 6-311+G(d,p)   | 6.46   | 5.14   | 4.23   | 3.68   | 3.30    | 12   |
| PBE0                                     | B3LYP/6-31+G(d)  | 6-311+G(d,p)   | 6.11   | 4.71   | 3.77   | 3.19   | 2.81    | 12   |
| PBE0                                     | PBE0/cc-pVQZ     | ANO-L-VTZP     | 6.00   | 4.75   | 3.81   | 3.23   | 2.82    | 1    |
| PBE0 <sup>a</sup>                        | PBE0/6-311G(d,p) | 6-311+G(2d,p)  | 6.02   | 4.61   | 3.60   | 3.00   |         | 13   |
| BHHLYP                                   | B3LYP/6-31+G(d)  | 6-311+G(d,p)   | 6.29   | 4.86   | 3.86   | 3.25   | 2.84    | 12   |
| BHHLYP <sup>a</sup>                      | PBE0/6-311G(d,p) | 6-311+G(2d,p)  | 6.32   | 4.77   | 3.71   | 3.07   |         | 13   |
| CAM-B3LYP <sup>a</sup>                   | PBE0/6-311G(d,p) | 6-311+G(2d,p)  | 6.08   | 4.59   | 3.56   | 2.93   |         | 13   |

<sup>a</sup>With PCM(dichloromethane) effects for both geometry and TD-DFT part.

## S2 Computational protocol for 0-0 energies

Following previous works,<sup>14,15</sup> we propose here an efficient approach that allowed to obtain accurate 0-0 energies for a large panel of solvated BODIPY and alike derivatives. We redirect the interested reader to these original references as well as to Ref. 16 for more details but we summarize the approach here. This protocol uses two atomic basis sets, SBS, a compact basis set for geometry optimizations and frequency calculations, and LBS, a large atomic basis set for total and transition energies. Reasonable choices for these two atomic basis sets are 6-31G(d) and 6-311+G(2d,p) as SBS and LBS, respectively. The approach also uses two variations of the well-known Polarizable Continuum Model (PCM) to model solvent effects: on the one hand, the linear-response (LR) approach<sup>17,18</sup> is applied for structures and vibrations whereas, on the other hand, a more refined model, either the corrected-LR (cLR)<sup>19</sup> or the state-specific (SS)<sup>20</sup> approaches, is used for both total and transition energies. The protocol presented below uses the cLR scheme, but can be straightforwardly adapted to the SS model. The equilibrium and non-equilibrium limits of the PCM approach are denoted eq and neq, respectively. Eventually, one could advocate the use of M06-2X for the DFT and TD-DFT components of the calculations. M06-2X is a global hybrid *meta*-GGA exchange-correlation functional that includes 54% of *exact* exchange.<sup>21</sup>

First, at the LR-PCM(eq)-TD-DFT/SBS level, one determines the optimal ground ( $R_{\text{SBS}}^{\text{GS}}$ ) and excited ( $R_{\text{SBS}}^{\text{ES}}$ ) state geometries. In a second step, one needs to compute the (harmonic) vibrations, at exactly the same level of theory. This gives access to the zero-point vibrational energies (ZPVE) of the two states,  $E_{\text{SBS}}^{\text{ZPVE-GS}}$  and  $E_{\text{SBS}}^{\text{ZPVE-ES}}$ . The difference between these two values,

$$\Delta E_{\text{SBS}}^{\text{ZPVE}}(\text{LR, eq}) = E_{\text{SBS}}^{\text{ZPVE-ES}} - E_{\text{SBS}}^{\text{ZPVE-GS}} \quad (\text{S-1})$$

has to be determined. Next, using the optimal ground-state geometry one can determine the vertical absorption in gas-phase, as well as both equilibrium and non-equilibrium limits

for the solvated compounds,

$$\Delta E_{\text{LBS}}^{\text{vert-a}}(\text{gas}) = E_{\text{LBS}}^{\text{ES}}(R_{\text{SBS}}^{\text{GS}}, \text{gas}) - E_{\text{LBS}}^{\text{GS}}(R_{\text{SBS}}^{\text{GS}}, \text{gas}) \quad (\text{S-2})$$

$$\Delta E_{\text{LBS}}^{\text{vert-a}}(\text{cLR}, \text{neq}) = E_{\text{LBS}}^{\text{ES}}(R_{\text{SBS}}^{\text{GS}}, \text{cLR}, \text{neq}) - E_{\text{LBS}}^{\text{GS}}(R_{\text{SBS}}^{\text{GS}}, \text{eq}) \quad (\text{S-3})$$

$$\Delta E_{\text{LBS}}^{\text{vert-a}}(\text{cLR}, \text{eq}) = E_{\text{LBS}}^{\text{ES}}(R_{\text{SBS}}^{\text{GS}}, \text{cLR}, \text{eq}) - E_{\text{LBS}}^{\text{GS}}(R_{\text{SBS}}^{\text{GS}}, \text{eq}) \quad (\text{S-4})$$

$$\Delta \Delta E_{\text{LBS}}^{\text{vert-a}} = \Delta E_{\text{LBS}}^{\text{vert-a}}(\text{cLR}, \text{neq}) - \Delta E_{\text{LBS}}^{\text{vert-a}}(\text{cLR}, \text{eq}) \quad (\text{S-5})$$

where  $E^{\text{GS}}$  and  $E^{\text{ES}}$  are respectively the total energies of the ground and excited states determined at the optimal ground-state geometry.  $\Delta \Delta E_{\text{LBS}}^{\text{vert-a}}$  is the difference between non-equilibrium and equilibrium vertical absorption energies. Similarly, using the optimal excited-state geometry, one can obtain vertical fluorescence energies,

$$\Delta E_{\text{LBS}}^{\text{vert-f}}(\text{gas}) = E_{\text{LBS}}^{\text{ES}}(R_{\text{SBS}}^{\text{ES}}, \text{gas}) - E_{\text{LBS}}^{\text{GS}}(R_{\text{SBS}}^{\text{ES}}, \text{gas}) \quad (\text{S-6})$$

$$\Delta E_{\text{LBS}}^{\text{vert-f}}(\text{cLR}, \text{neq}) = E_{\text{LBS}}^{\text{ES}}(R_{\text{SBS}}^{\text{ES}}, \text{cLR}, \text{eq}) - E_{\text{LBS}}^{\text{GS}}(R_{\text{SBS}}^{\text{ES}}, \text{neq}) \quad (\text{S-7})$$

$$\Delta E_{\text{LBS}}^{\text{vert-f}}(\text{cLR}, \text{eq}) = E_{\text{LBS}}^{\text{ES}}(R_{\text{SBS}}^{\text{ES}}, \text{cLR}, \text{eq}) - E_{\text{LBS}}^{\text{GS}}(R_{\text{SBS}}^{\text{ES}}, \text{eq}) \quad (\text{S-8})$$

$$\Delta \Delta E_{\text{LBS}}^{\text{vert-f}} = \Delta E_{\text{LBS}}^{\text{vert-f}}(\text{cLR}, \text{neq}) - \Delta E_{\text{LBS}}^{\text{vert-f}}(\text{cLR}, \text{eq}) \quad (\text{S-9})$$

The adiabatic energy can be readily obtained from previous data,

$$\Delta E_{\text{LBS}}^{\text{adia}}(\text{gas}) = E_{\text{LBS}}^{\text{ES}}(R_{\text{SBS}}^{\text{ES}}, \text{gas}) - E_{\text{LBS}}^{\text{GS}}(R_{\text{SBS}}^{\text{GS}}, \text{gas}) \quad (\text{S-10})$$

$$\Delta E_{\text{LBS}}^{\text{adia}}(\text{cLR}, \text{eq}) = E_{\text{LBS}}^{\text{ES}}(R_{\text{SBS}}^{\text{ES}}, \text{cLR}, \text{eq}) - E_{\text{LBS}}^{\text{GS}}(R_{\text{SBS}}^{\text{GS}}, \text{eq}) \quad (\text{S-11})$$

and the same holds for best estimates of the 0-0 energies, that are obtained by adding Eqs. (S-1) and (S-11),

$$\Delta E_{\text{BE}}^{0-0}(\text{eq}) = \Delta E_{\text{LBS}}^{\text{adia}}(\text{cLR}, \text{eq}) + \Delta E_{\text{SBS}}^{\text{ZPVE}}(\text{LR}, \text{eq}) \quad (\text{S-12})$$

These 0-0 energies are often compared to the experimental absorption-fluorescence crossing

point (AFCP). However, the measured absorption and fluorescence curves correspond to neq phenomena, and therefore, one needs to correct the previous equation thanks to the results of Eqs. (S-5) and (S-9)

$$\Delta E_{\text{BE}}^{\text{AFCP}}(\text{neq}) = \Delta E_{\text{BE}}^{0-0}(\text{eq}) + \frac{1}{2} [\Delta \Delta E_{\text{LBS}}^{\text{vert-a}} + \Delta \Delta E_{\text{LBS}}^{\text{vert-f}}] \quad (\text{S-13})$$

An explanation of the presence of the 1/2 factor can be found in Ref. 16.  $\Delta E_{\text{BE}}^{\text{AFCP}}(\text{neq})$  in Eq (S-13) constitutes the theoretical best estimate of the AFCP obtained at the TD-DFT level. As explained in the Account, adiabatic TD-DFT does a poor job for cyanine and BODIPY derivatives, and it is necessary to correct these energies with the results obtained through adequate wavefunction ( $\Psi$ ) theories, e.g., CC2, SOS-CIS(D) or GW/BSE. If only gas phase calculations are available, then one first need to determine the gas-phase transition energies with the selected  $\Psi$  on both  $R_{\text{SBS}}^{\text{GS}}$  and  $R_{\text{SBS}}^{\text{ES}}$ . The adiabatic energy presents a form similar to Eq. (S-10),

$$\Delta E_{\text{LBS}}^{\text{adia-}\Psi}(\text{gas}) = E_{\text{LBS}}^{\text{ES-}\Psi}(R_{\text{SBS}}^{\text{ES}}, \text{gas}) - E_{\text{LBS}}^{\text{GS-}\Psi}(R_{\text{SBS}}^{\text{GS}}, \text{gas}) \quad (\text{S-14})$$

where  $E^{\text{ES-}\Psi}$  and  $E^{\text{GS-}\Psi}$  are respectively the wavefunction excited-state and ground-state energies determined on the (TD)-DFT geometries. For instance, if the SOS-CIS(D) method is applied, the ground-state [excited-state] energy is determined with a single-point SOS-MP2 [SOS-CIS(D)] calculation. This allows to correct the TD-DFT estimates obtained in Eq. (S-13),

$$\Delta E_{\text{BE}}^{\text{AFCP-}\Psi}(\text{neq}) = \Delta E_{\text{BE}}^{\text{AFCP}}(\text{neq}) + [\Delta E_{\text{LBS}}^{\text{adia-}\Psi}(\text{gas}) - \Delta E_{\text{LBS}}^{\text{adia}}(\text{gas})] \quad (\text{S-15})$$

which generally well reproduce the experimental values.

## References

- 1 Send, R.; Valsson, O.; Filippi, C. Electronic Excitations of Simple Cyanine Dyes: Reconciling Density Functional and Wave Function Methods. *J. Chem. Theory Comput.* **2011**, *7*, 444–455.
- 2 Schreiber, M.; Bub, V.; Fülcher, M. P. The Electronic Spectra of Symmetric Cyanine Dyes: A CASPT2 Study. *Phys. Chem. Chem. Phys.* **2001**, *3*, 3906–3912.
- 3 Filatov, M.; Huix-Rotllant, M. Assessment of Density Functional Theory Based  $\Delta$ SCF and Linear Response Methods for Longest Wavelength Excited States of Extended  $\Pi$ -Conjugated Molecular Systems. *J. Chem. Phys.* **2014**, *141*, 024112.
- 4 Moore II, B.; Autschbach, J. Longest-Wavelength Electronic Excitations of Linear Cyanines: The Role of Electron Delocalization and of Approximations in Time-Dependent Density Functional Theory. *J. Chem. Theory Comput.* **2013**, *9*, 4991–5003.
- 5 Boulanger, P.; Jacquemin, D.; Duchemin, I.; Blase, X. Fast and Accurate Electronic Excitations in Cyanines with the Many-Body Bethe–Salpeter Approach. *J. Chem. Theory Comput.* **2014**, *10*, 1212–1218.
- 6 Fabian, J.; Hartmann, H. *Light Absorption of Organic Colorants*; Reactivity and Structure Concepts in Organic Chemistry; Springer-Verlag: Berlin, 1980; Vol. 12.
- 7 Fabian, J. Electronic Excitation of Sulfur–Organic Compounds - Performance of Time-Dependent Density Functional Theory. *Theor. Chem. Acc.* **2001**, *106*, 199–217.
- 8 Jacquemin, D.; Perpète, E. A.; Scalmani, G.; Frisch, M. J.; Kobayashi, R.; Adamo, C. An Assessment of the Efficiency of Long-Range Corrected Functionals for Some Properties of Large Compounds. *J. Chem. Phys.* **2007**, *126*, 144105.
- 9 Jacquemin, D.; Zhao, Y.; Valero, R.; Adamo, C.; Ciofini, I.; Truhlar, D. G. Verdict: Time-Dependent Density Functional Theory “Not Guilty” of Large Errors for Cyanines. *J. Chem. Theory Comput.* **2012**, *8*, 1255–1259.
- 10 Grimme, S.; Neese, F. Double-Hybrid Density Functional Theory for Excited Electronic States of Molecules. *J. Chem. Phys.* **2007**, *127*, 154116.



- 11 Zhekova, H.; Krykunov, M.; Autschbach, J.; Ziegler, T. Applications of Time Dependent and Time Independent Density Functional Theory to the First  $\pi$  to  $\pi^*$  Transition in Cyanine Dyes. *J. Chem. Theory Comput.* **2014**, *10*, 3299–3307.
- 12 Fabian, J. TDDFT-Calculations of Vis/NIR Absorbing Compounds. *Dyes Pigm.* **2010**, *84*, 36–53.
- 13 Jacquemin, D.; Wathelet, V.; Perpète, E. A.; Adamo, C. Extensive TD-DFT Benchmark: Singlet-Excited States of Organic Molecules. *J. Chem. Theory Comput.* **2009**, *5*, 2420–2435.
- 14 Chibani, S.; Laurent, A. D.; Le Guennic, B.; Jacquemin, D. Improving the Accuracy of Excited State Simulations of BODIPY and aza-BODIPY Dyes with a Joint SOS-CIS(D) and TD-DFT Approach. *J. Chem. Theory Comput.* **2014**, *10*, 4574–4582.
- 15 Boulanger, P.; Chibani, S.; Le Guennic, B.; Duchemin, I.; Blase, X.; Jacquemin, D. Combining the Bethe–Salpeter Formalism with Time-Dependent DFT Excited-State Forces to Describe Optical Signatures: NBO Fluoroborates as Working Examples. *J. Chem. Theory Comput.* **2014**, *10*, 4548–4556.
- 16 Jacquemin, D.; Planchat, A.; Adamo, C.; Mennucci, B. A TD-DFT Assessment of Functionals for Optical 0-0 Transitions in Solvated Dyes. *J. Chem. Theory Comput.* **2012**, *8*, 2359–2372.
- 17 Cammi, R.; Mennucci, B.; Tomasi, J. Second-Order Moller-Plesset Analytical Derivatives for the Polarizable Continuum Model Using the Relaxed Density Approach. *J. Phys. Chem. A* **1999**, *103*, 9100–9108.
- 18 Cossi, M.; Barone, V. Time-Dependent Density Functional Theory for Molecules in Liquid Solutions. *J. Chem. Phys.* **2001**, *115*, 4708–4717.
- 19 Caricato, M.; Mennucci, B.; Tomasi, J.; Ingrosso, F.; Cammi, R.; Corni, S.; Scalmani, G. Formation and Relaxation of Excited States in Solution: A New Time Dependent Polarizable Continuum Model Based on Time Dependent Density Functional Theory. *J. Chem. Phys.* **2006**, *124*, 124520.
- 20 Impropa, R.; Scalmani, G.; Frisch, M. J.; Barone, V. Toward Effective and Reliable Fluorescence Energies in Solution by a New State Specific Polarizable Continuum Model Time Dependent Density Functional Theory Approach. *J. Chem. Phys.* **2007**, *127*, 074504.
- 21 Zhao, Y.; Truhlar, D. G. The M06 Suite of Density Functionals for Main Group Thermochemistry, Thermochemical Kinetics, Noncovalent Interactions, Excited States, and Transition Elements: Two New Functionals and Systematic Testing of Four M06-Class Functionals and 12 Other Functionals. *Theor. Chem. Acc.* **2008**, *120*, 215–241.
